# Supplementary material for: Sustainable Growth of Medicinal and Aromatic Mediterranean Plants Growing as Communities in Shallow Substrate Urban Green Roof Systems
Source: MDPI journal article supplement (doi:10.3390/su15075940), 2023-03-29
Supplement: s1 [file s1]

## Supplementary Material

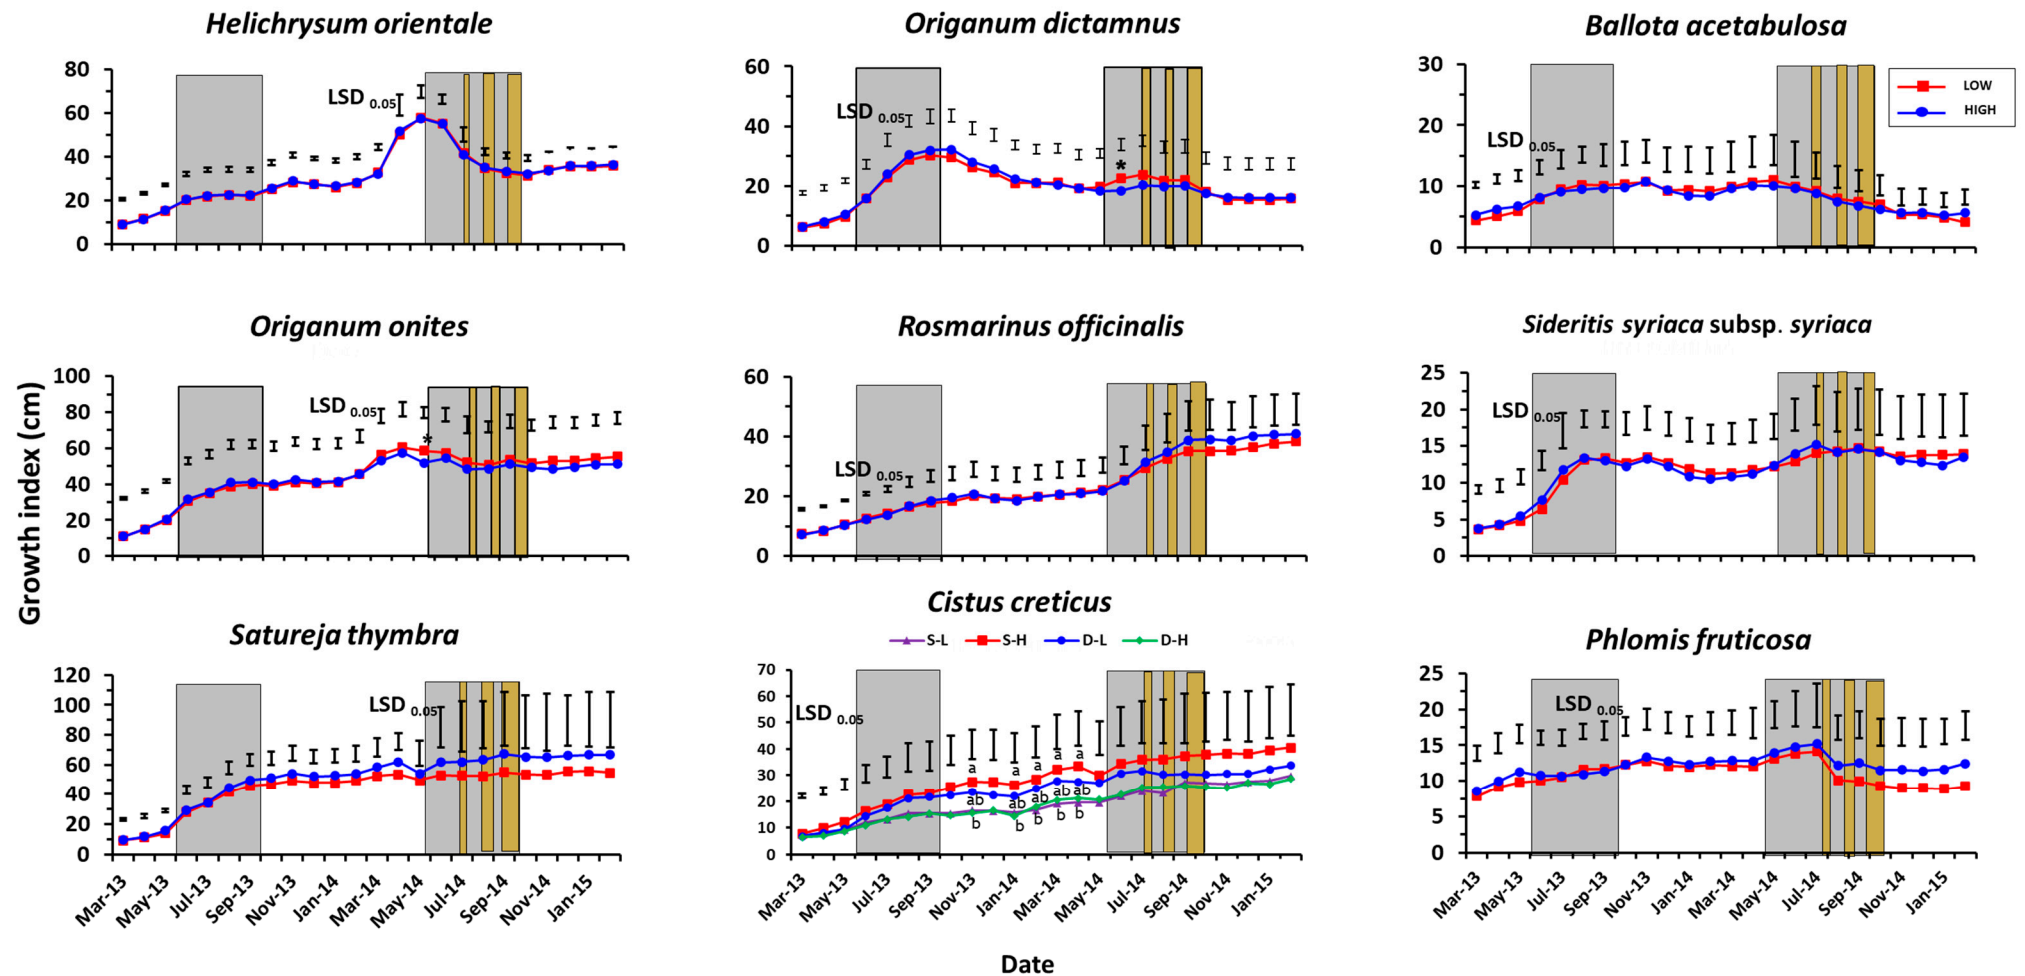

**Figure S1.** Irrigation regime (Low: 10% ET<sub>0</sub> and High: 20% ET<sub>0</sub>) effects on the growth index of the plants of the first plant community. The asterisk indicates a significant difference between treatment means based on the Least Significant Difference (LSD) criterion. Bars represented LSD at a significance level of  $p < 0.05$ . The gray-shaded areas indicate the two periods of water stress (4 June–27 September 2013 and 20 May–22 October 2014), while the brown areas indicate the three drought periods (20–25 July, 22–31 August, 24 September–10 October 2014). *Cistus creticus* was analysed as One-Way ANOVA due to interactions between the two factors (shallow/deep substrate and low/high irrigation regime). Letters indicate the mean values being statistically different within the same date, using LSD criterion at a significance level of  $p < 0.05$ .

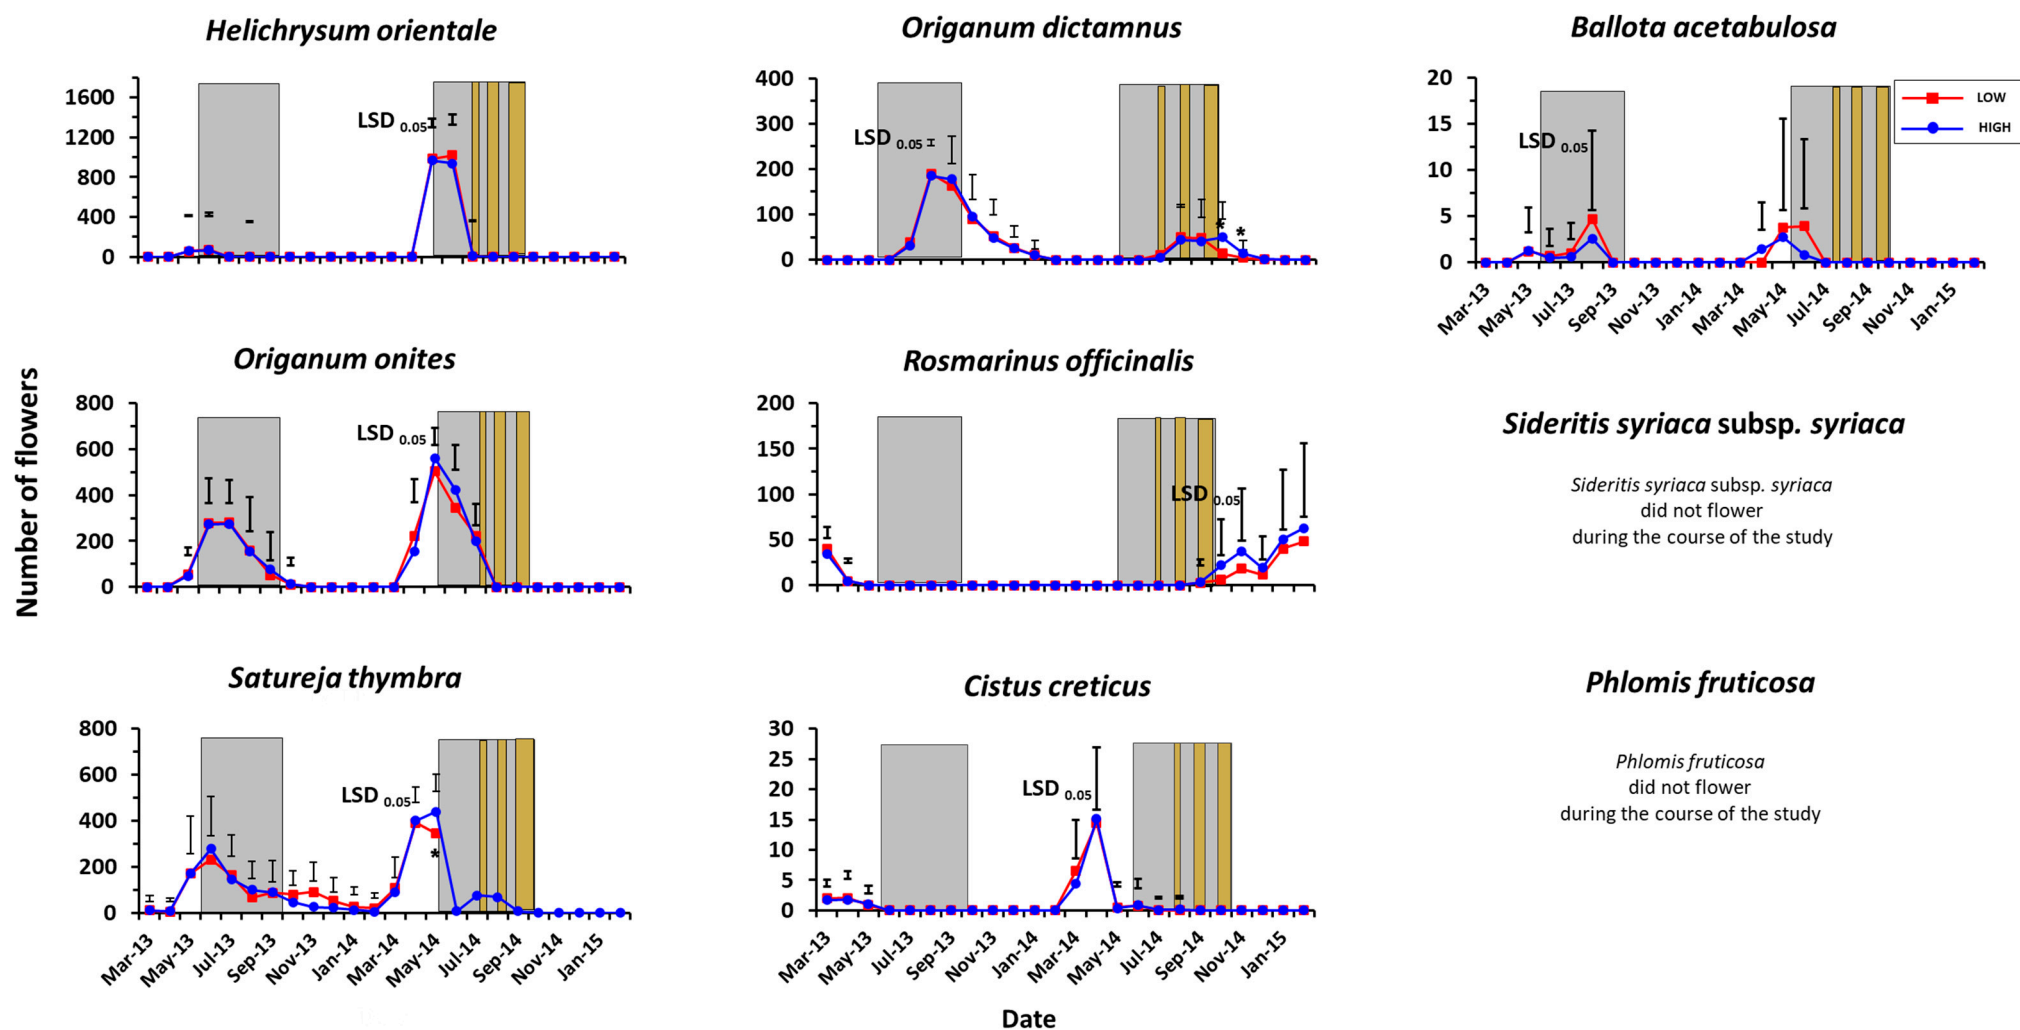

**Figure S2.** Irrigation regime (Low: 10% ETo and High: 20% ETo) effects on the flowering of the first plant community. The asterisk indicates a significant difference between treatment means based on the Least Significant Difference (LSD) criterion. Bars represented LSD at a significance level of  $p < 0.05$ . The gray-shaded areas indicate the two periods of water stress (4 June–27 September 2013 and 20 May–22 October 2014), while the brown areas indicate the three drought periods (20–25 July, 22–31 August, 24 September–10 October 2014).

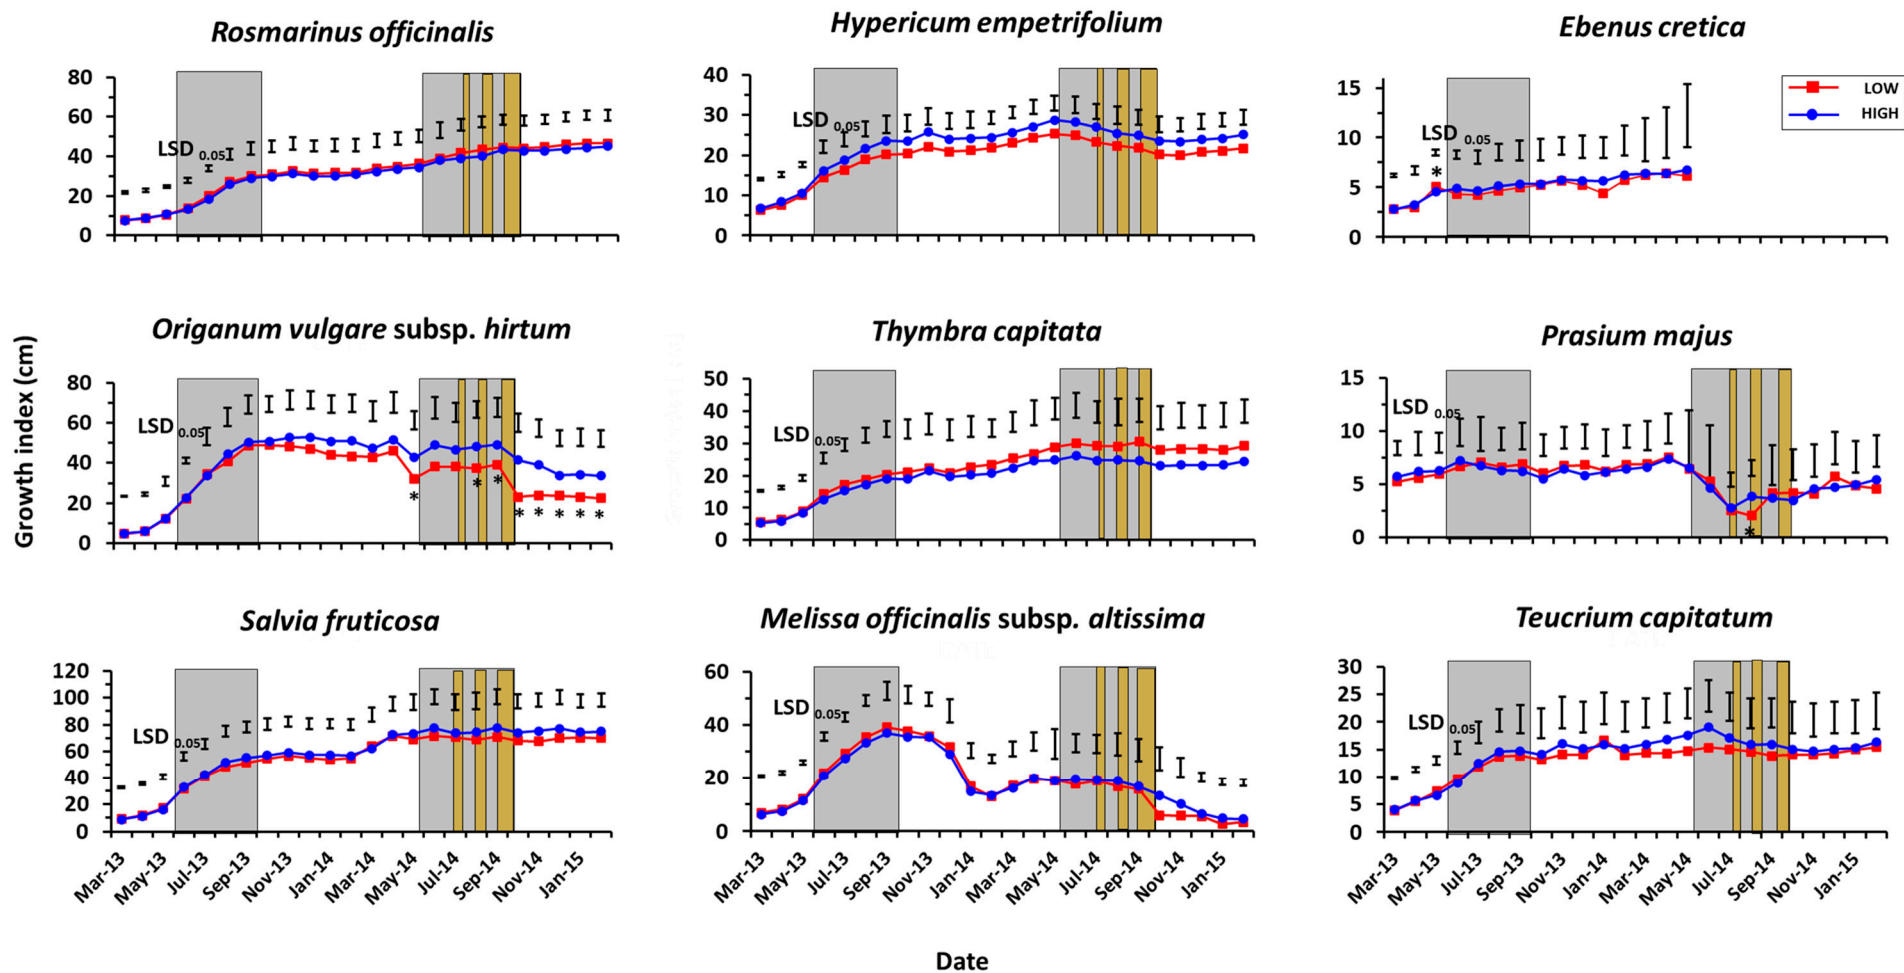

**Figure S3.** Irrigation regime (Low: 10% ET<sub>0</sub> and High: 20% ET<sub>0</sub>) effects on the growth index of the plants of the second plant community. The asterisk indicates a significant difference between treatment means based on the Least Significant Difference (LSD) criterion. Bars represented LSD at a significance level of  $p < 0.05$ . The gray-shaded areas indicate the two periods of water stress (4 June–27 September 2013 and 20 May–22 October 2014), while the brown areas indicate the three drought periods (20–25 July, 22–31 August, 24 September–10 October 2014).

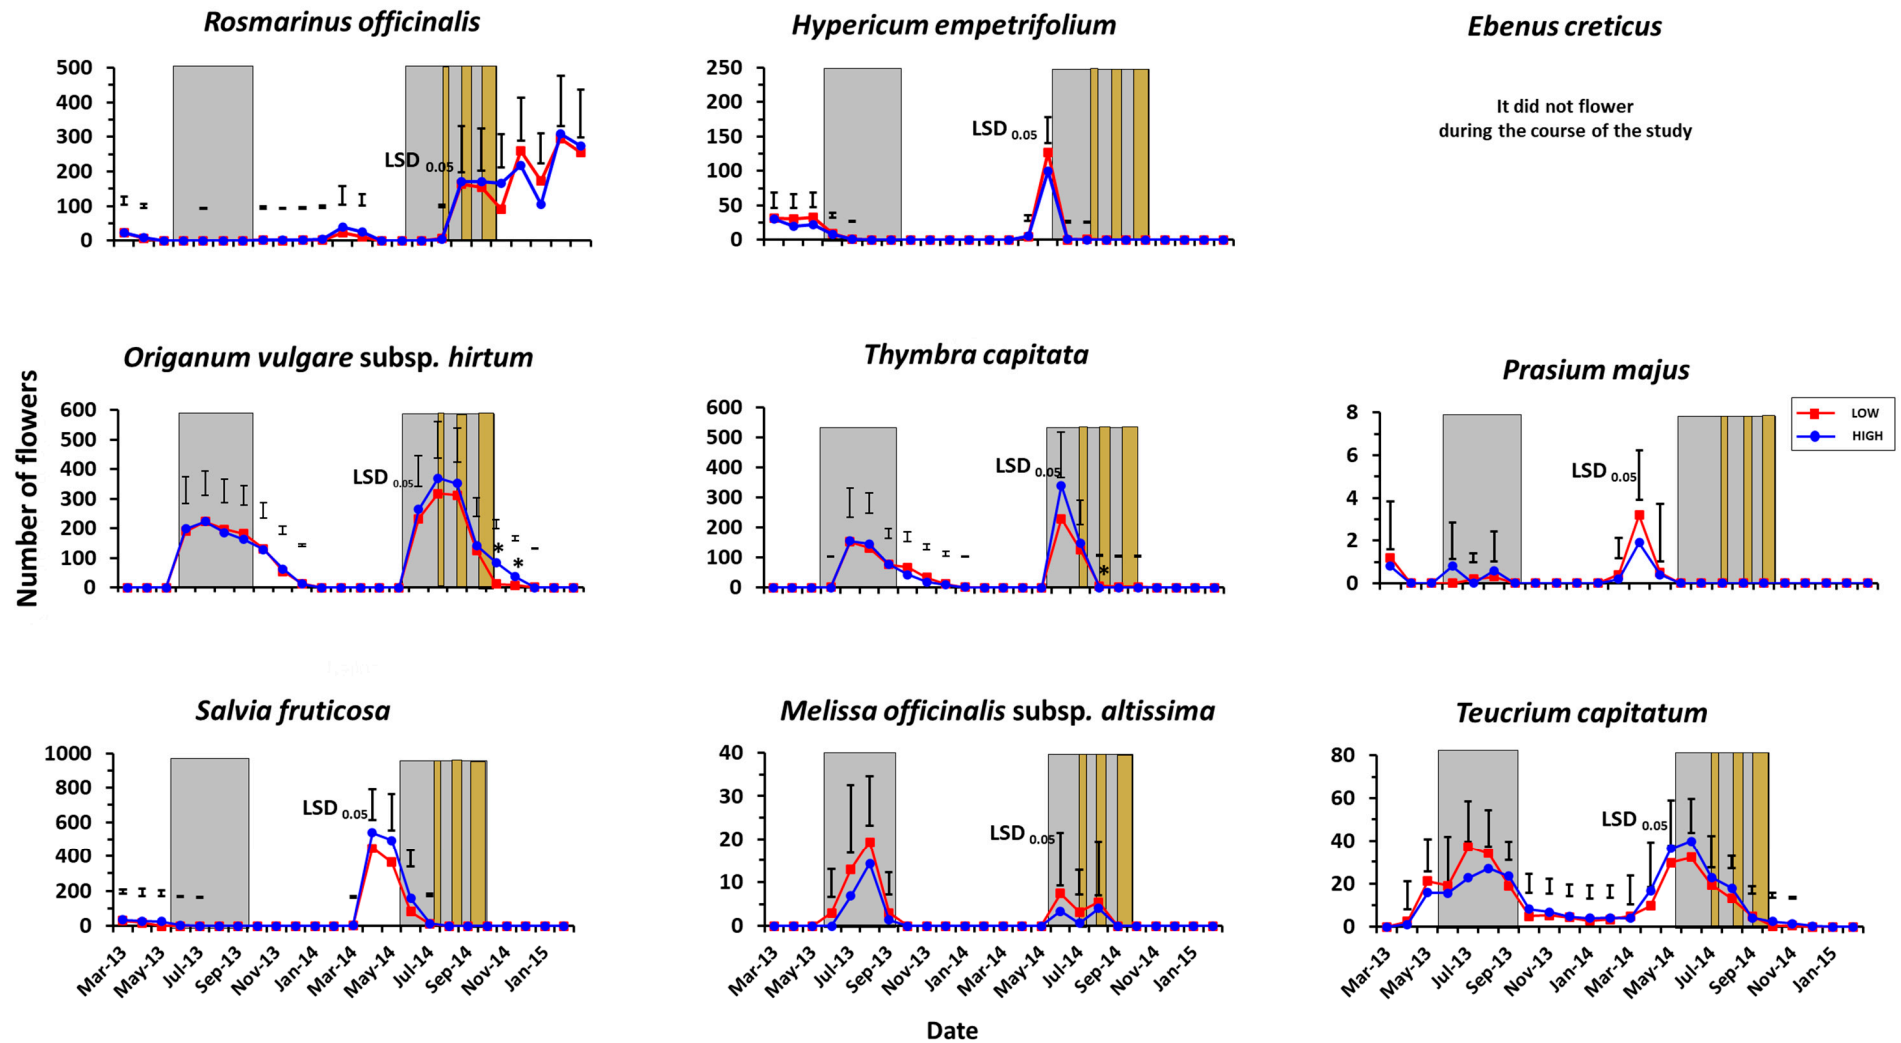

**Figure S4.** Irrigation regime (Low: 10% ETo and High: 20% ETo) effects on the flowering of the second plant community. The asterisk indicates a significant difference between treatment means based on the Least Significant Difference (LSD) criterion. Bars represented LSD at a significance level of  $p < 0.05$ . The gray-shaded areas indicate the two periods of water stress (4 June–27 September 2013 and 20 May–22 October 2014), while the brown areas indicate the three drought periods (20–25 July, 22–31 August, 24 September–10 October 2014).

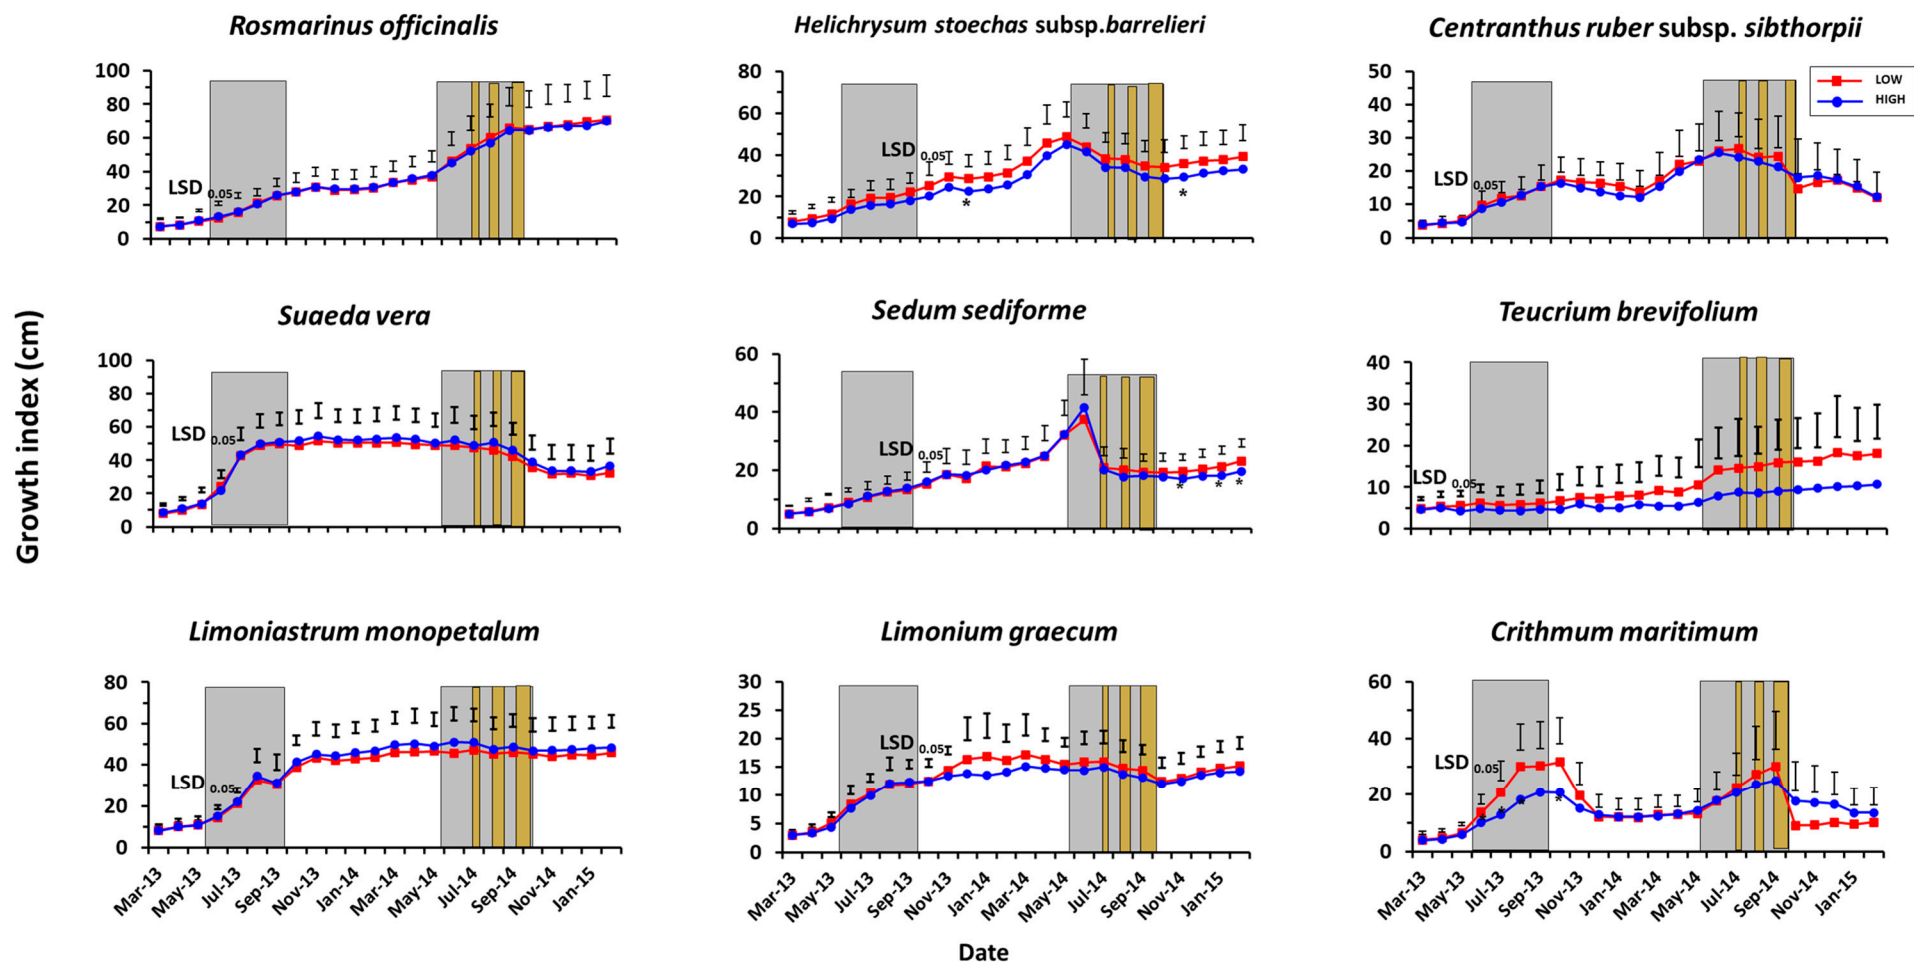

**Figure S5.** Irrigation regime (Low: 10% ETo and High: 20% ETo) effects on the growth index of the plants of the third plant community. The asterisk indicates a significant difference between treatment means based on the Least Significant Difference (LSD) criterion. Bars represented LSD at a significance level of  $p < 0.05$ . The gray-shaded areas indicate the two periods of water stress (4 June–27 September 2013 and 20 May–22 October 2014), while the brown areas indicate the three drought periods (20–25 July, 22–31 August, 24 September–10 October 2014).



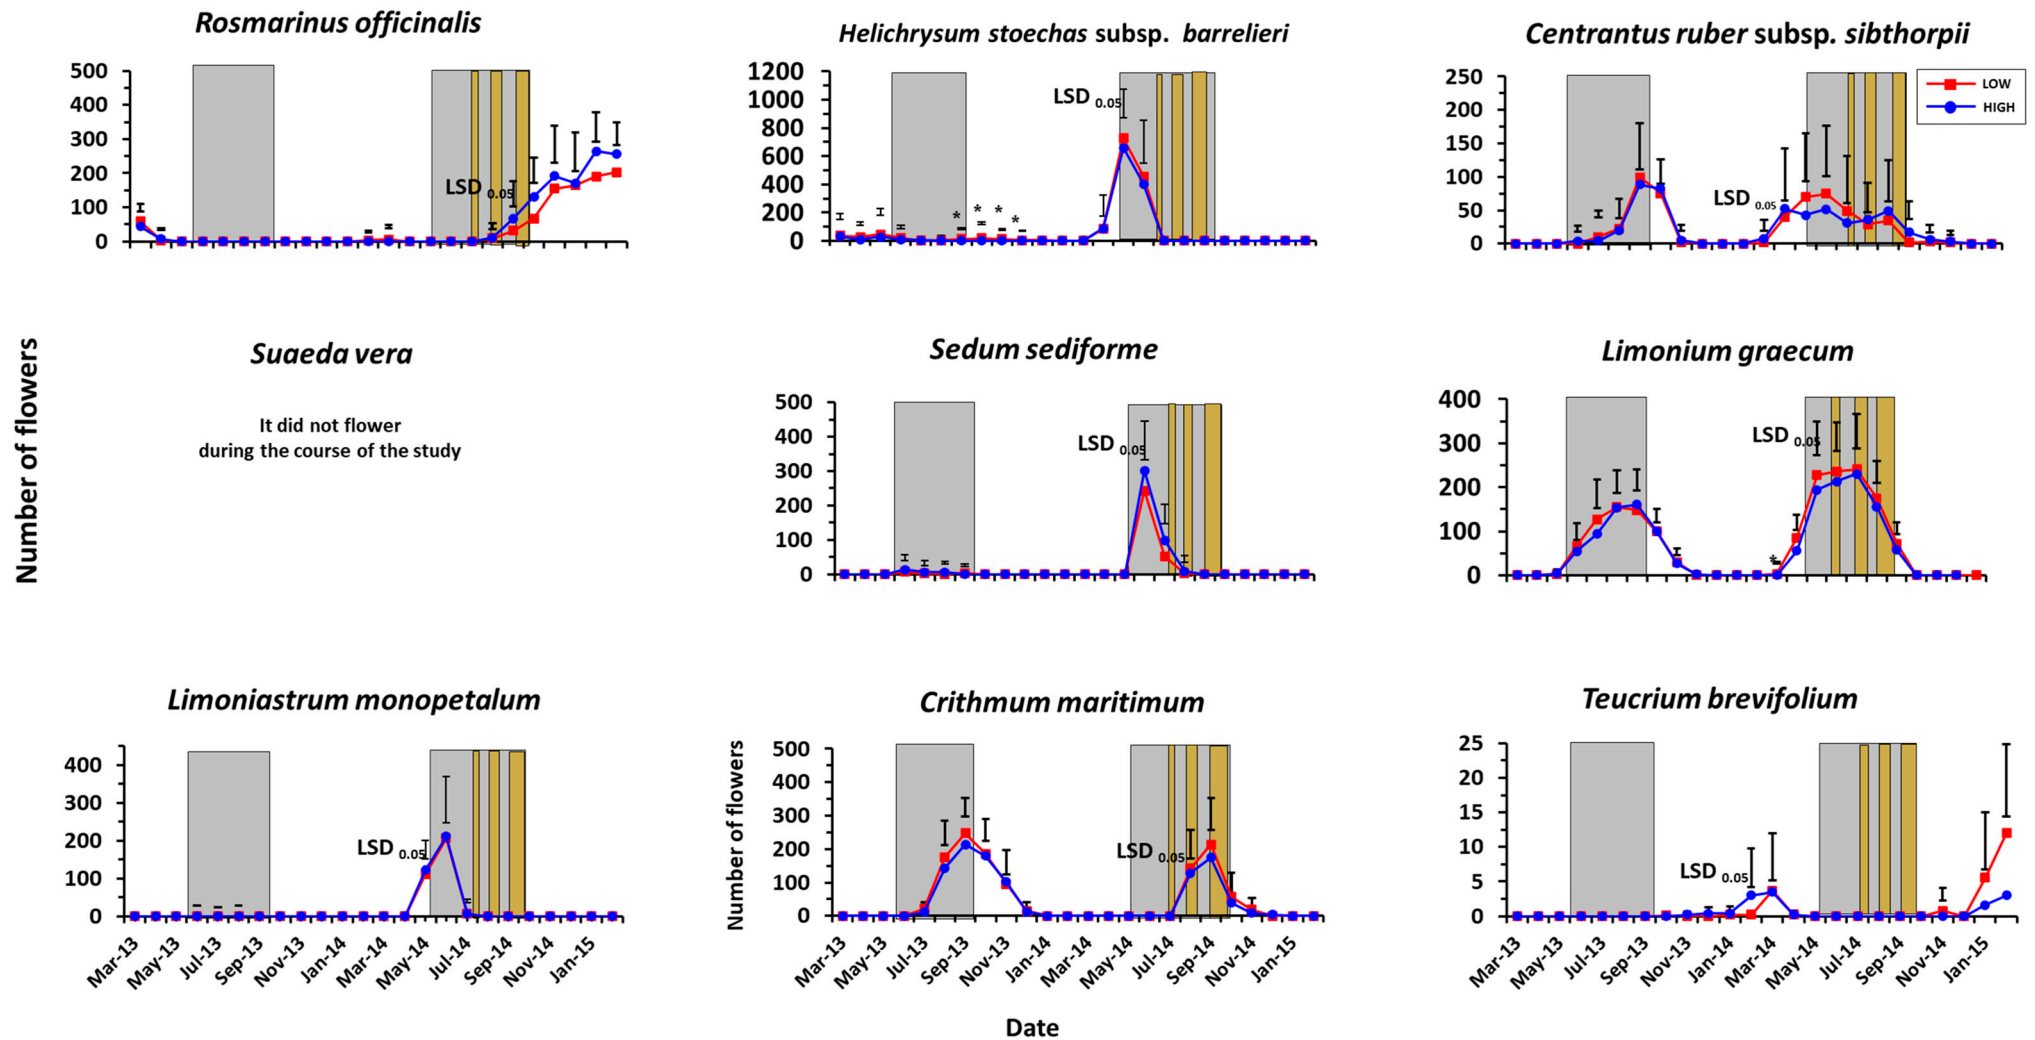

**Figure S6.** Irrigation regime (Low: 10% ET<sub>0</sub> and High: 20% ET<sub>0</sub>) effects on the flowering of the third plant community. The asterisk indicates a significant difference between treatment means based on the Least Significant Difference (LSD) criterion. Bars represented LSD at a significance level of  $p < 0.05$ . The gray-shaded areas indicate the two periods of water stress (4 June–27 September 2013 and 20 May–22 October 2014), while the brown areas indicate the three drought periods (20–25 July, 22–31 August, 24 September–10 October 2014).

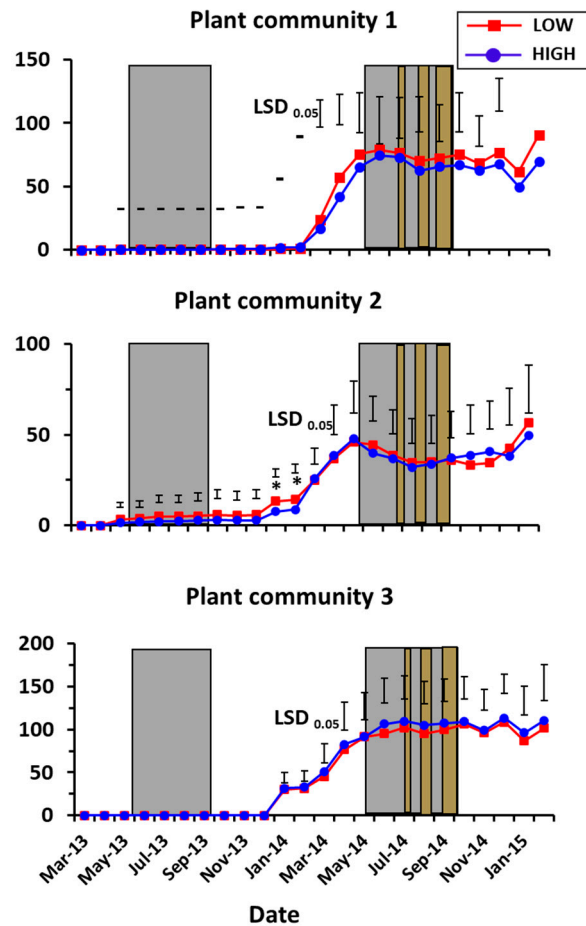

**Figure S7.** Irrigation regime ((Low: 10%  $ET_0$  and High: 20%  $ET_0$ ) effects on the number of self-reproduced plants of the three plant communities. The asterisk indicates a significant difference between treatment means based on the Least Significant Difference (LSD) criterion. Bars represented LSD at a significance level of  $p < 0.05$ . The gray-shaded areas indicate the two periods of water stress (4 June–27 September 2013 and 20 May–22 October 2014), while the brown areas indicate the three drought periods (20–25 July, 22–31 August, 24 September–10 October 2014).
